# Supplementary material
Source: Springer Nature journal article supplement (https://www.springermedizin.de/resource/supplementary/12883_2013_814_MOESM3_ESM.pdf/9456338)

**A**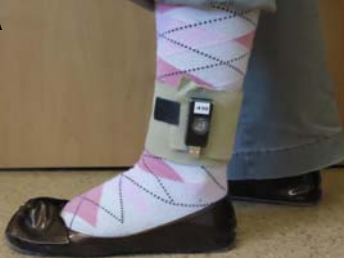**B**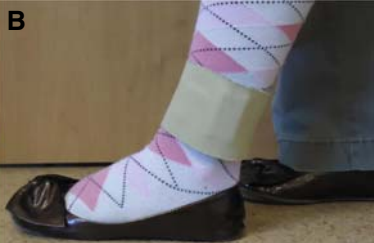

Supplement: MOESM3 [file 9456338]
